# Supplementary material
Source: publisher figshare collection journal article supplement (https://frontiersin.figshare.com/ndownloader/files/16851161)
Supplement: Supplementary file [file 16851161]

**CLP1, a novel PHD domain protein, participates in  
regulating cellulase gene expression in the filamentous  
fungus *Trichoderma reesei***

Lei Wang, Renfei Yang, Yanli Cao, Fanglin Zheng, Xiangfeng Meng, Guanjun Chen,  
Weixin Zhang<sup>\*</sup>, Weifeng Liu<sup>\*</sup>

State Key Laboratory of Microbial Technology, Shandong University, No.72 Binhai  
Road, Qingdao 266237, P. R. China

<sup>\*</sup> Correspondence should be addressed to W Zhang or W Liu.

E-mail: [zhangwx@sdu.edu.cn](mailto:zhangwx@sdu.edu.cn); [weifliu@sdu.edu.cn](mailto:weifliu@sdu.edu.cn)

**Supplemental Data**

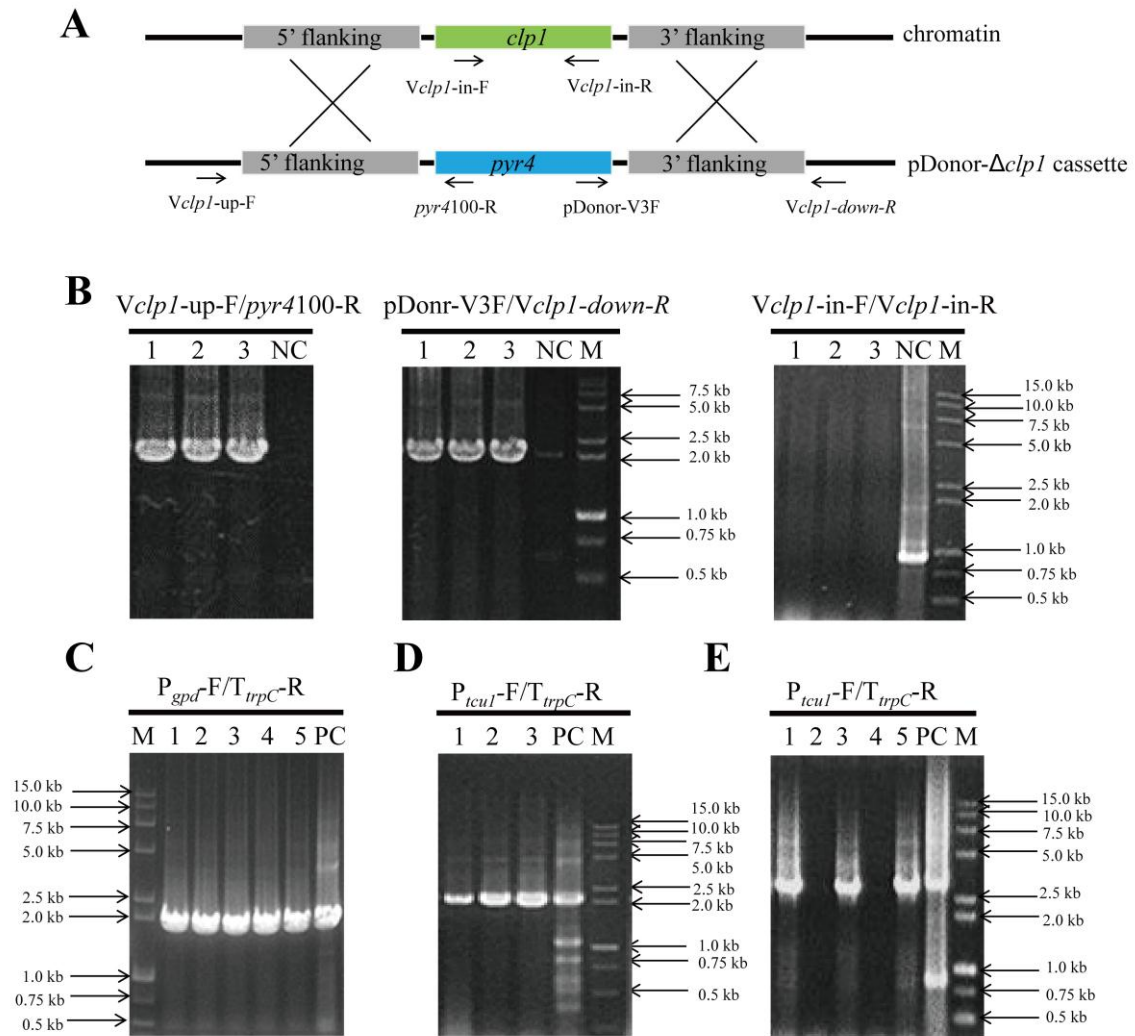

**Fig. S1. Verification of correct DNA integration in the *T. reesei* mutant strains constructed in this study.** (A-B) Schematic illustration of the *clp1* deletion cassette (A) and verification for its correct integration into the genome (B). (C) PCR amplification to verify correct integration of  $P_{gpd-clp1-T_{trpC}}$ ,  $P_{gpd-clp1\_ΔUIM-T_{trpC}}$  and  $P_{gpd-clp1\_PHDM-T_{trpC}}$  plasmids in the  $Δclp1$  strain, respectively. (D) PCR amplification to verify correct integration of  $pMDP_{tcul-ace3-T_{trpC}}$  plasmid in the  $Δclp1\&OEace3$  strain. (E) PCR amplification to verify correct integration of

pMDP<sub>tcu1-xyr1-TrpC</sub> plasmid in the  $\Delta clp1$ &OE<sub>xyr1</sub> strain. All the amplified fragments correspond to the expected size.

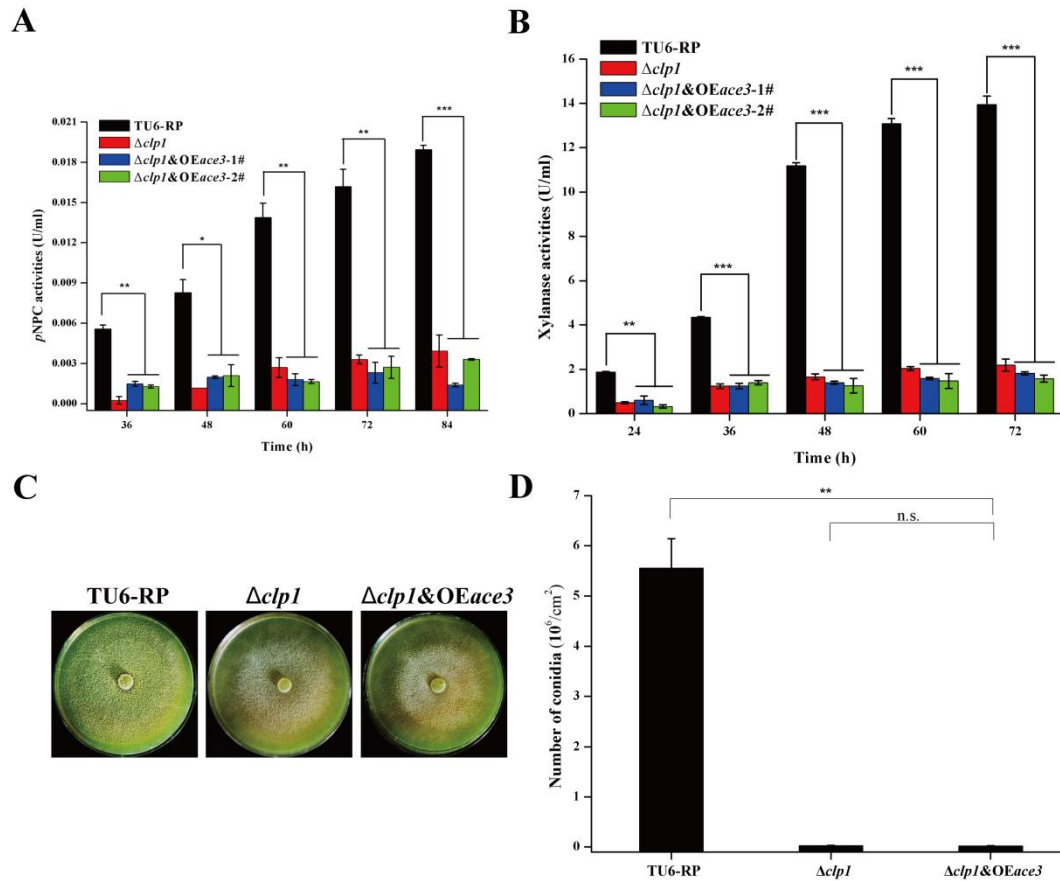

**Fig. S2. Overexpression of ACE3 did not rescue the defect of cellulase expression and conidiation resulted from *clp1* deletion.** (A-B) Extracellular pNPC activities (A) and xylanase activities (B) of the culture supernatant from TU6-RP,  $\Delta clp1$  and  $\Delta clp1$ &OE<sub>ace3</sub> strains cultured on 1% (w/v) Avicel or 0.5% (w/v) xylan. (C-D) Conidia formation of the control strain TU6-RP, and  $\Delta clp1$  and  $\Delta clp1$ &OE<sub>xyr1</sub> incubated on malt extract agar plates at 30 °C for 5 days (E) and conidia counting (F).
